# Supplementary material for: Compo: composite motif discovery using discrete models
Source: Springer Nature journal article supplement (doi:10.1186/1471-2105-9-527), 2008-12-01

# Muscle dataset

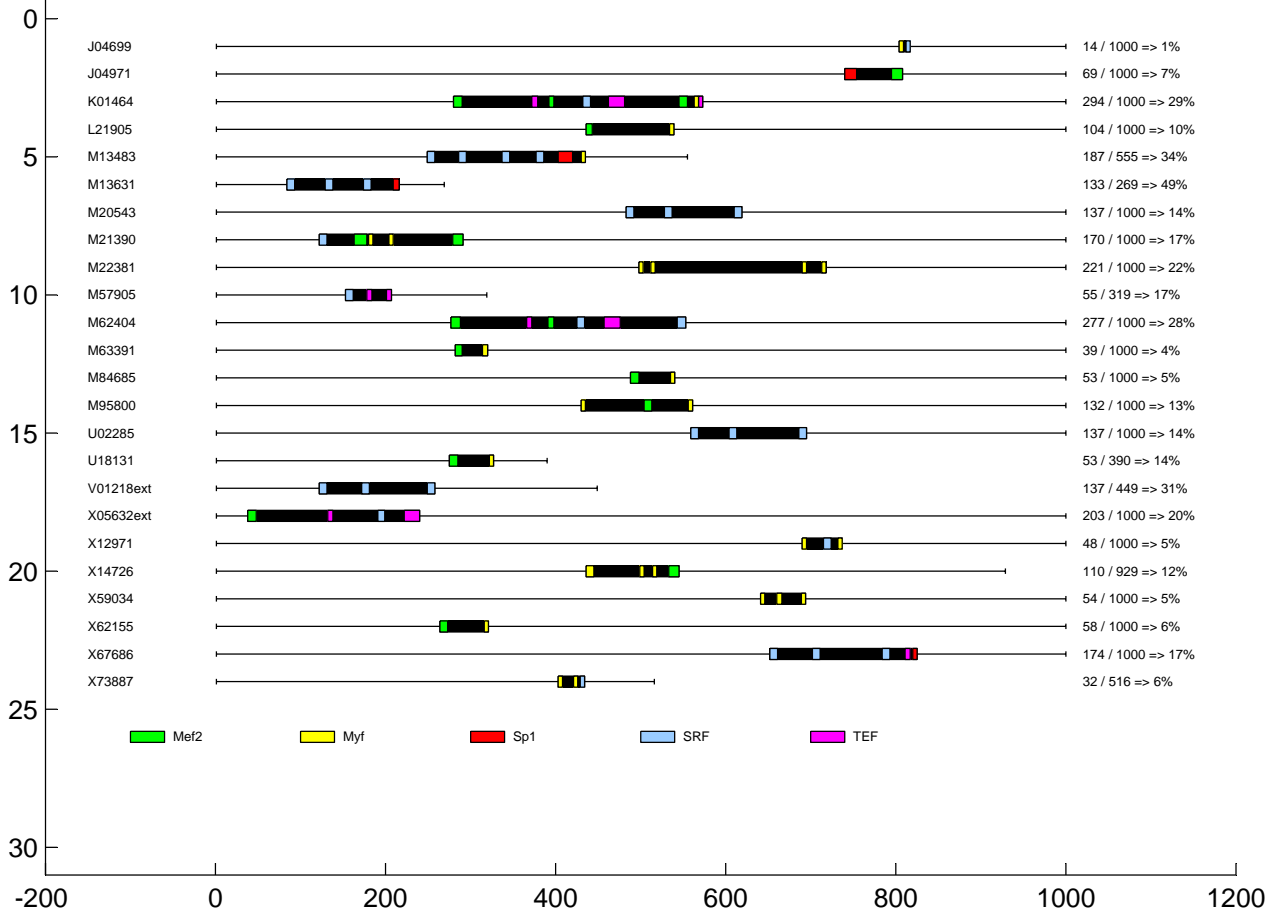

## Selected modules in muscle sequences

|                  | <b>Mef2</b><br>(A/T-rich) | <b>Myf</b><br>(MyoD, E-box) | <b>Sp1</b><br>(GC-box) | <b>SRF</b><br>(CArG) | <b>TEF</b><br>(M-CAT) |
|------------------|---------------------------|-----------------------------|------------------------|----------------------|-----------------------|
| MUS01: X59034    |                           | 3                           |                        |                      |                       |
| MUS03: M22381    |                           | 4                           |                        |                      |                       |
| MUS09: M13483    |                           | 1                           | 1                      | 4                    |                       |
| MUS10: M21390    | 2                         | 2                           |                        | 1                    |                       |
| MUS12: M63391    | 1                         | 1                           |                        |                      |                       |
| MUS15: U18131    | 1                         | 1                           |                        |                      |                       |
| MUS16: M84685    | 1                         | 1                           |                        |                      |                       |
| MUS18: X62155    | 1                         | 1                           |                        |                      |                       |
| MUS19: M95800    | 1                         | 2                           |                        |                      |                       |
| MUS21: X14726    | 1                         | 3                           |                        |                      |                       |
| MUS22: X12971    |                           | 2                           |                        | 1                    |                       |
| MUS23: J04971    | 1                         |                             | 1                      |                      |                       |
| MUS24: L21905    | 1                         |                             | 1                      |                      |                       |
| MUS27: M57905    |                           |                             |                        | 1                    | 2                     |
| MUS28: X73887    |                           | 2                           |                        |                      | 1                     |
| MUS29: J04699    |                           | 1                           |                        |                      | 1                     |
| MUS34: X05632ext | 1                         |                             |                        | 1                    | 2                     |
| MUS36: M62404    | 2                         |                             |                        | 2                    | 2                     |
| MUS37: K01464    | 3                         | 1                           |                        | 1                    | 3                     |
| MUS38: V01218ext |                           |                             |                        | 3                    |                       |
| MUS39: U02285    |                           |                             |                        | 3                    |                       |
| MUS41: M20543    |                           |                             |                        | 3                    |                       |
| MUS42: M13631    |                           |                             |                        | 3                    | 1                     |
| MUS43: X67686    |                           |                             | 1                      | 3                    | 1                     |
| <i>Sum</i>       | <b>16</b>                 | <b>25</b>                   | <b>4</b>               | <b>26</b>            | <b>13</b>             |

24 modules in 24 sequences  
5 different motifs  
84 TF binding sites

## Nucleotide-level, Muscle

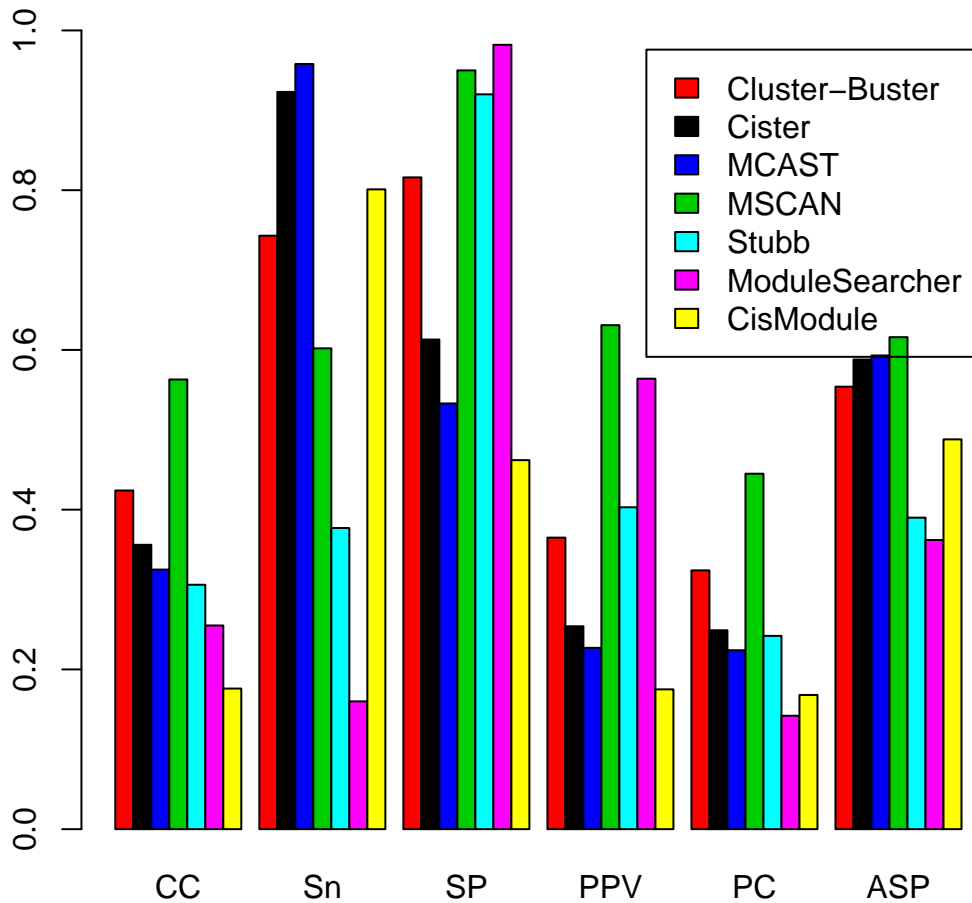

# Motif-level, Muscle

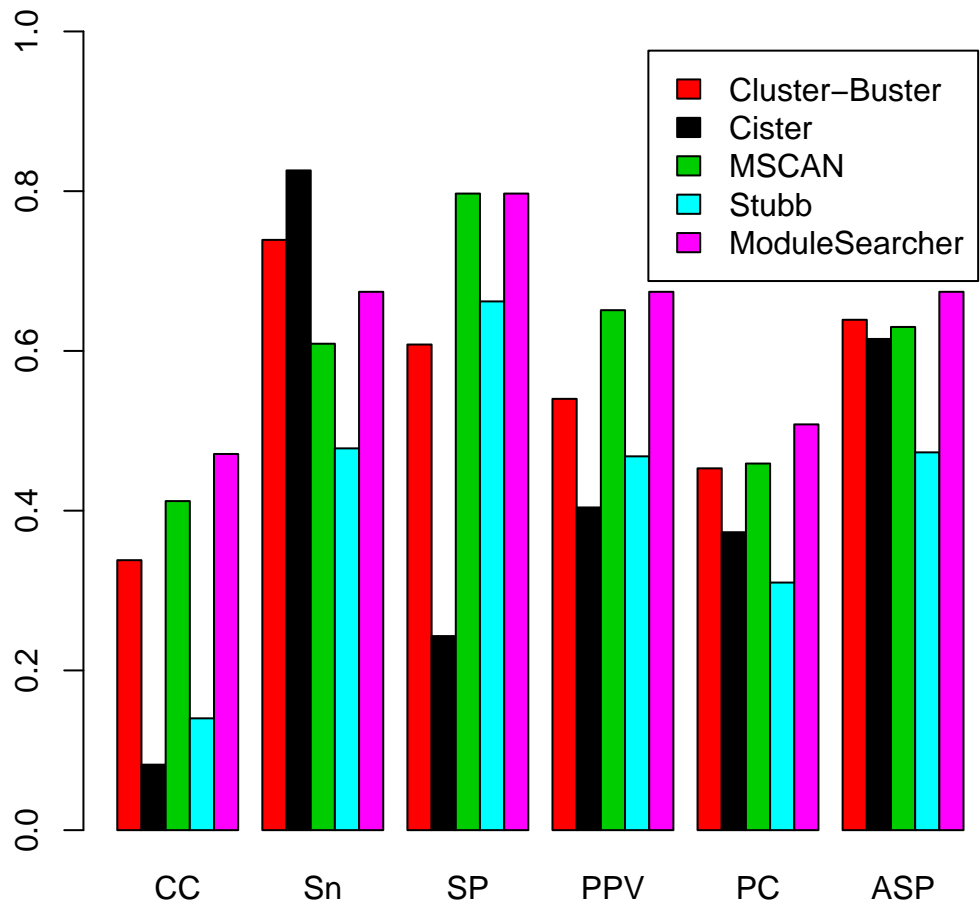

Supplement: 12859_2008_2512_MOESM2_ESM.pdf [file 12859_2008_2512_MOESM2_ESM.pdf]
