# Supplementary material for: Compo: composite motif discovery using discrete models
Source: Springer Nature journal article supplement (doi:10.1186/1471-2105-9-527), 2008-12-01

# Liver dataset

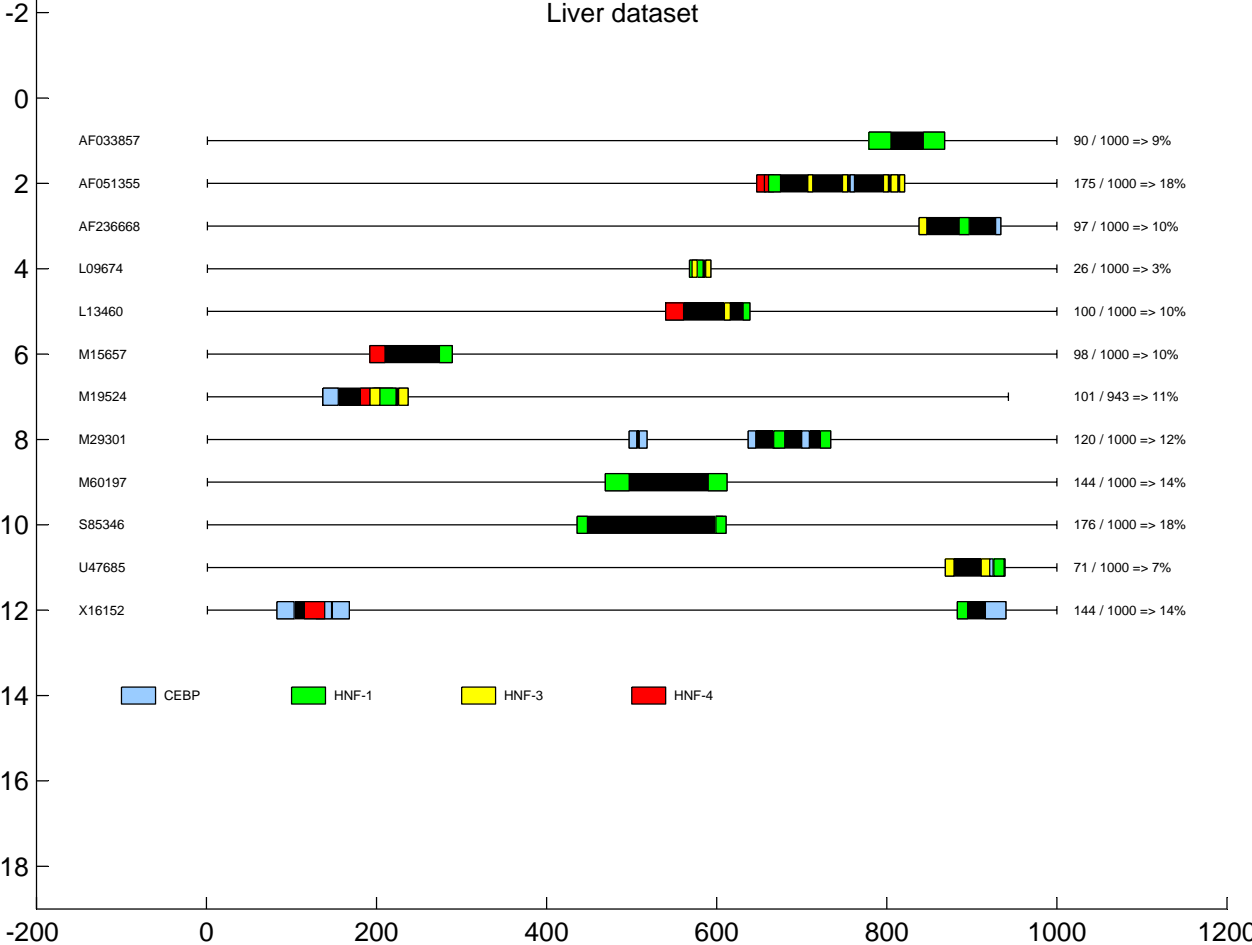

# Modules

|            | HNF-1 | HNF-3 | HNF-4 | CEBP |
|------------|-------|-------|-------|------|
| AF033857   | 2     |       |       |      |
| AF051355   | 1     | 5     | 2     | 1    |
| AF236668   | 1     | 1     | 0     | 1    |
| L09674     | 1     | 2     |       |      |
| L13460     | 1     | 1     | 1     |      |
| M15657     | 1     |       | 1     |      |
| M19524     | 1     | 2     | 1     | 2    |
| M29301 (a) |       |       |       | 2    |
| M29301 (b) | 2     |       |       | 3    |
| M60197     | 2     |       |       |      |
| S85346     | 2     |       |       | 1    |
| U47685     | 2     | 2     |       | 1    |
| X16152 (a) | 1     |       |       | 1    |
| X16152 (b) |       |       | 1     | 3    |

14 modules in 12 sequences

4 different motifs

51 binding sites

# Nucleotide-level, Liver

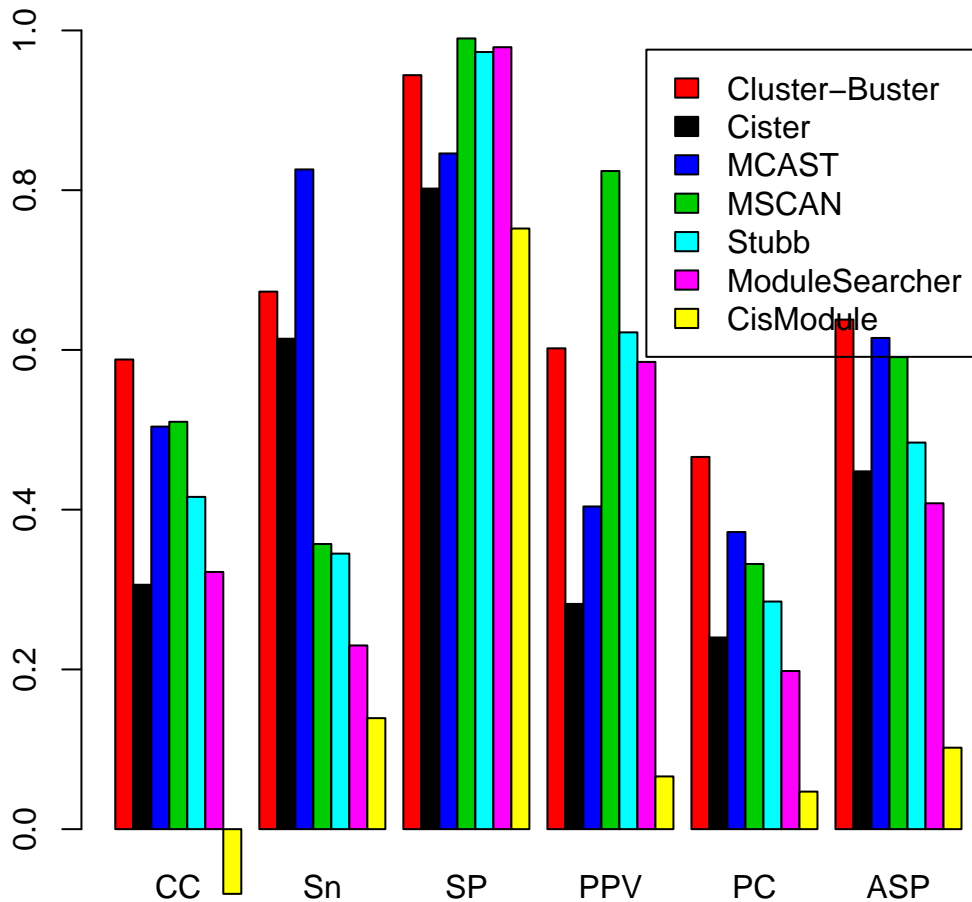

## Motif-level, Liver

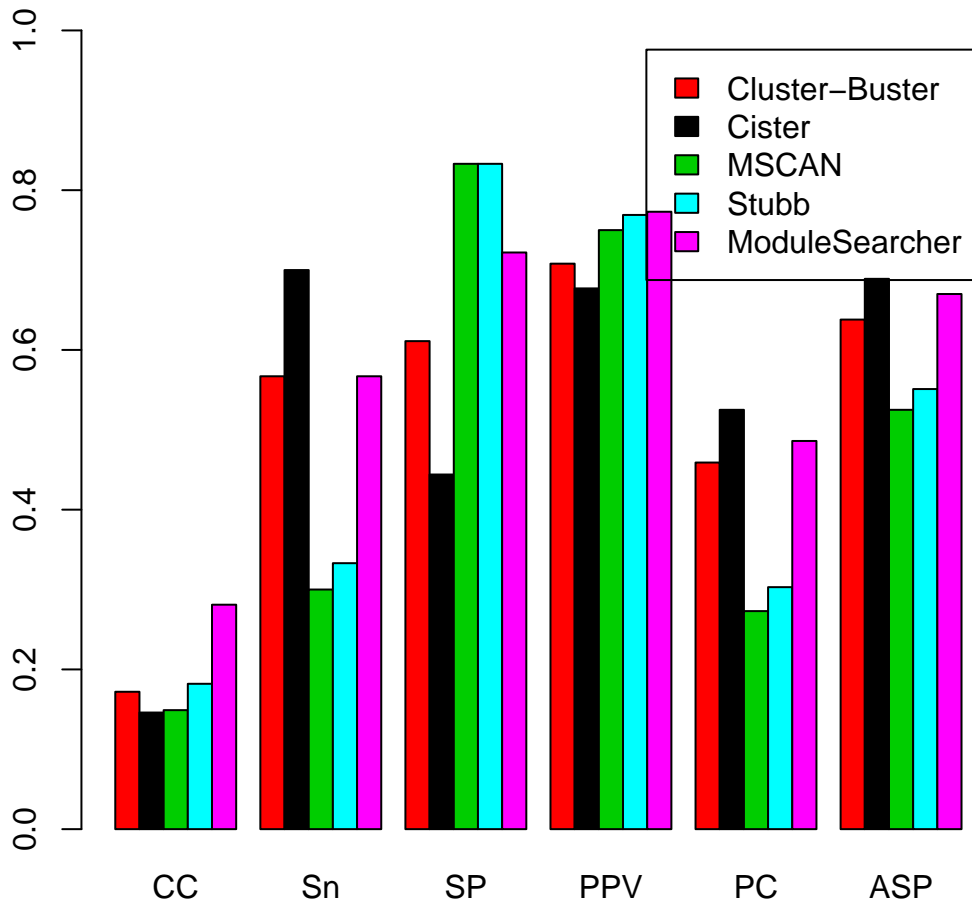

Supplement: 12859_2008_2512_MOESM3_ESM.pdf [file 12859_2008_2512_MOESM3_ESM.pdf]
