# Supplementary material for: Compo: composite motif discovery using discrete models
Source: Springer Nature journal article supplement (doi:10.1186/1471-2105-9-527), 2008-12-01

Levels

0

1

2

c

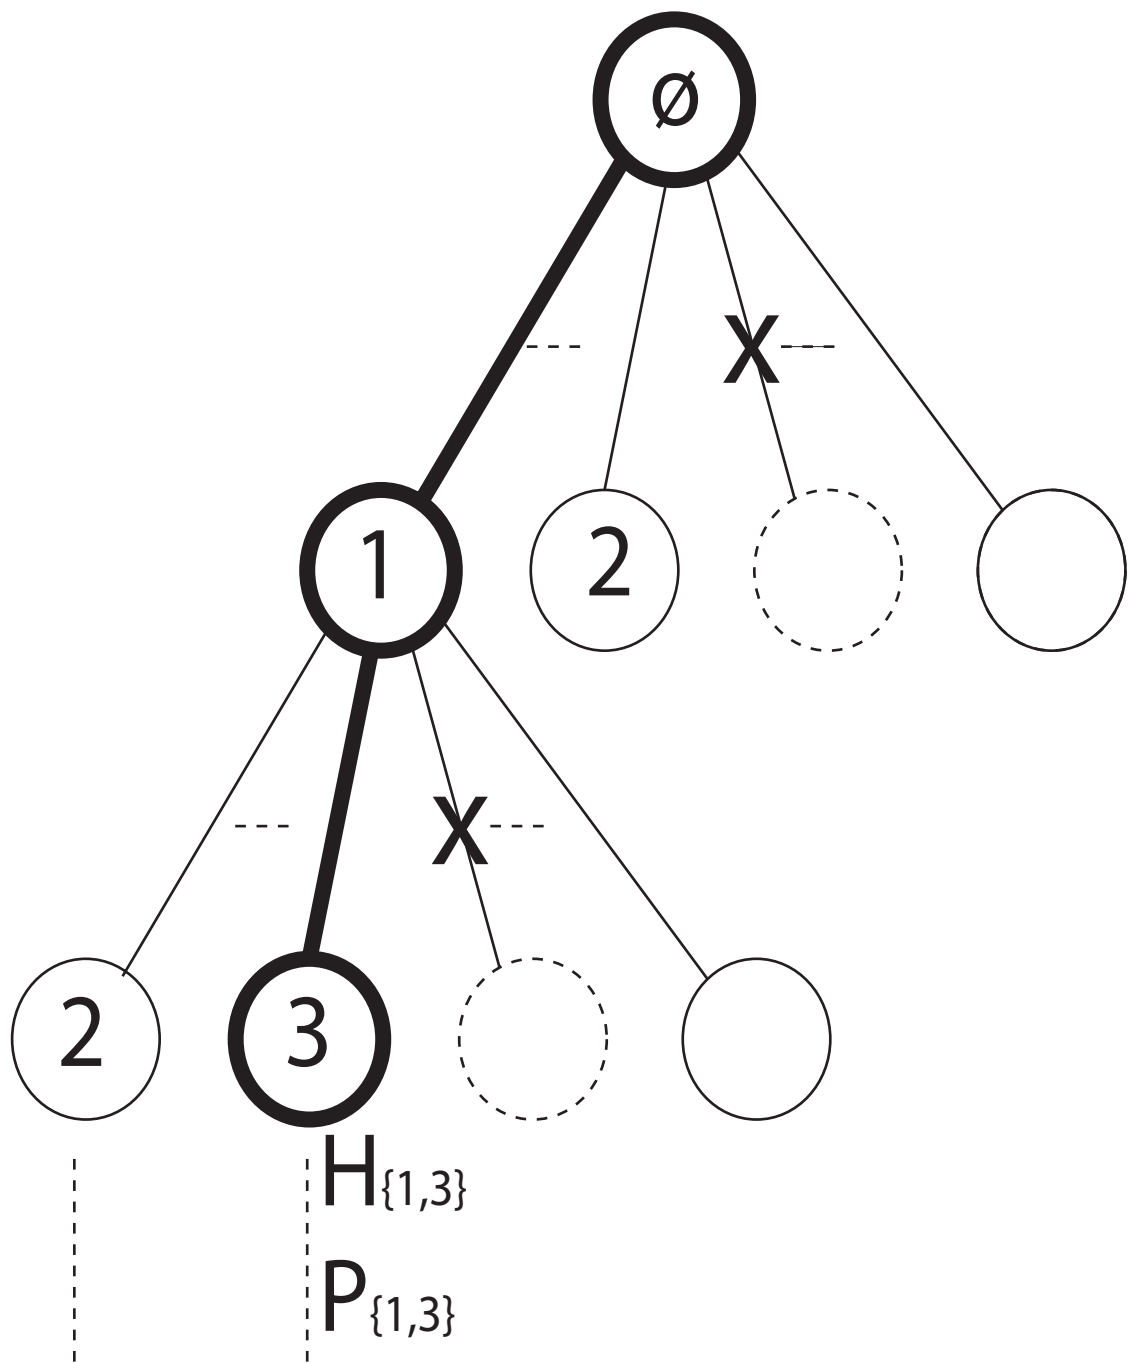

Supplement: 12859_2008_2512_MOESM5_ESM.pdf [file 12859_2008_2512_MOESM5_ESM.pdf]
